# Supplementary material for: SIRT1 decreases Lox-1-mediated foam cell formation in atherogenesis
Source: PubMed Central journal article supplement — Eur Heart J. 2010 Apr 23;31(18):2301–9. doi: 10.1093/eurheartj/ehq107 (PMC2938465; doi:10.1093/eurheartj/ehq107), 2010-04-23
Supplement: supp_ehq107_ehq107supp.pdf [file supp_ehq107_ehq107supp.pdf]

## **Supplemental Data for**

### **SIRT1 decreases Lox-1-mediated foam cell formation in atherogenesis**

**Sokrates Stein<sup>1,2</sup>, Christine Lohmann<sup>1,2</sup>, Nicola Schäfer<sup>1,2</sup>, Janin Hofmann<sup>3</sup>, Lucia Rohrer<sup>2,4</sup>, Christian Besler<sup>1,2</sup>, Karin M. Rothgiesser<sup>5</sup>, Burkhard Becher<sup>2,3</sup>, Michael O. Hottiger<sup>2,5</sup>, Jan Borén<sup>6</sup>, Michael W. McBurney<sup>7</sup>, Ulf Landmesser<sup>1,2</sup>, Thomas F. Lüscher<sup>1,2</sup> and Christian M. Matter<sup>1,2\*</sup>**

<sup>1</sup>Cardiovascular Research, Institute of Physiology; <sup>2</sup>Zurich Center for Integrative Human Physiology (ZIHP); <sup>3</sup>Neuroimmunology Unit, Inst. Experimental Immunology; <sup>4</sup>Institute for Clinical Chemistry; <sup>5</sup>Institute of Veterinary Biochemistry and Molecular Biology, University of Zurich and University Hospital Zurich, CH-8057 Zurich, Switzerland. <sup>6</sup>Sahlgrenska Center for Cardiovascular and Metabolic Research, University of Goteborg, SE-41345 Goteborg, Sweden. <sup>7</sup>Ottawa Health Research Institute, Department of Medicine, University of Ottawa, ON K1Y 4E9 Ottawa, Canada.

**\*Corresponding author:** Christian M. Matter. e-mail: [cmatter@physiol.uzh.ch](mailto:cmatter@physiol.uzh.ch).

## SUPPLEMENTARY FIGURES

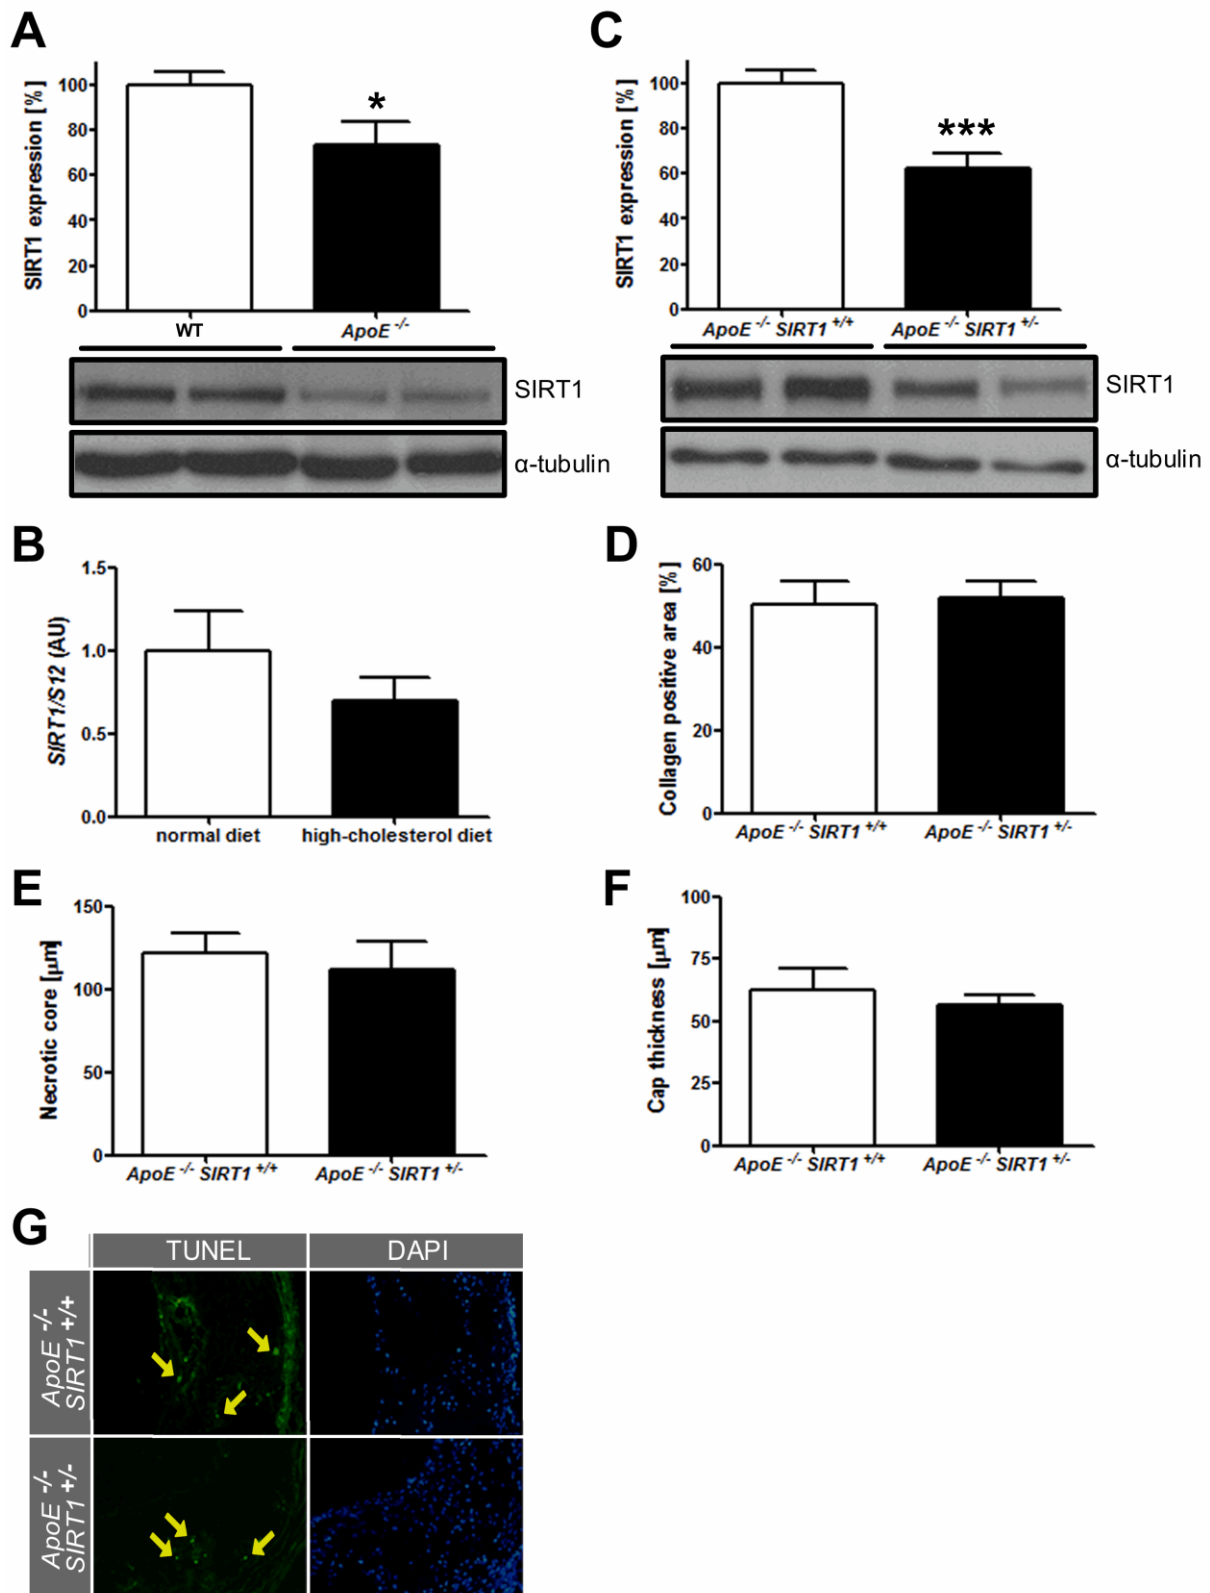

**Supplemental Figure 1.** Correlation between SIRT1 and atherogenesis. (A) Protein expression of SIRT1 and α-tubulin in *ApoE*<sup>-/-</sup> and WT aortic lysates. n=6 per genotype. (B)

SIRT1 mRNA levels in aortic tissue of wild-type mice treated a normal or high-cholesterol diet. n=4 per treatment group. (C) *ApoE*<sup>-/-</sup> *SIRT1*<sup>+/-</sup> mice express approximately 60% of *ApoE*<sup>-/-</sup> *SIRT1*<sup>+/+</sup> protein levels in aortic lysates. n=9 per genotype. (D-F) Quantification of collagen content (D), necrotic core size (E), and cap thickness in plaques from aortic sinus. n=8 per genotype. (F) TUNEL staining revealed no difference in amount of apoptotic cells. n=6 per genotype.

**A**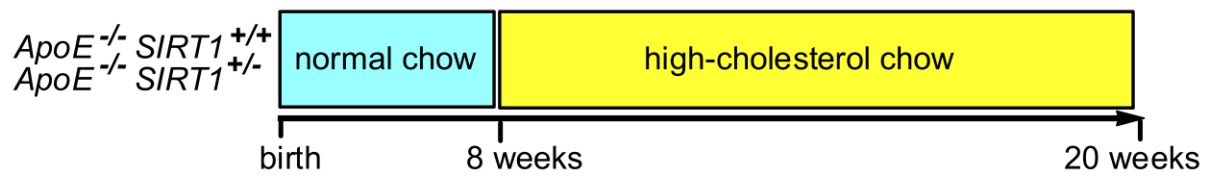**B**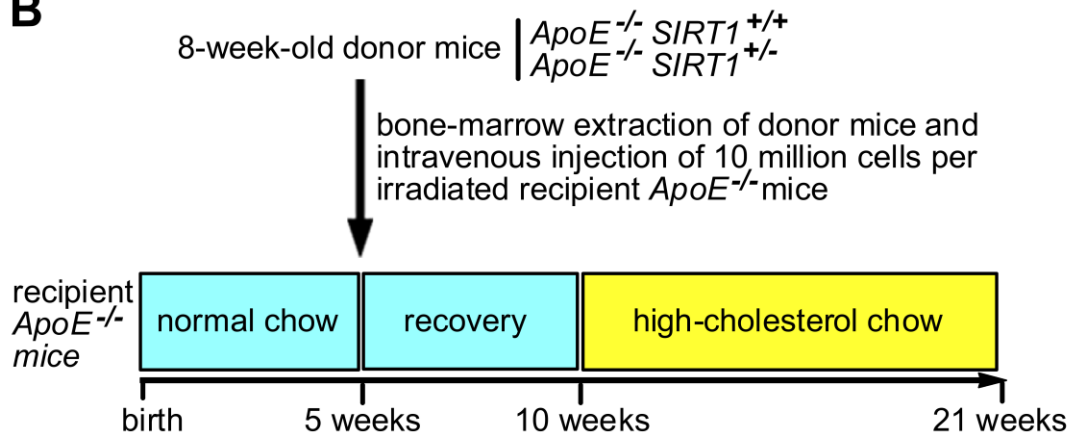

**Supplemental Figure 2.** Diet schemes. **(A)** 8 weeks after birth, *ApoE*<sup>-/-</sup> *SIRT1*<sup>+/+</sup> and *ApoE*<sup>-/-</sup> *SIRT1*<sup>+/-</sup> mice were kept on a high-cholesterol diet for 12 weeks. 20-week-old male animals were euthanized for tissue harvesting. **(B)** Bone-marrow from 8-week-old donor mice (*ApoE*<sup>-/-</sup> *SIRT1*<sup>+/+</sup> and *ApoE*<sup>-/-</sup> *SIRT1*<sup>+/-</sup>) was extracted, and 10<sup>6</sup> bone-marrow cells were injected intravenous into irradiated recipient *ApoE*<sup>-/-</sup> mice. Transplanted mice were allowed to recover for 5 weeks, and were then fed a high-cholesterol diet for 11 weeks prior to tissue harvesting.

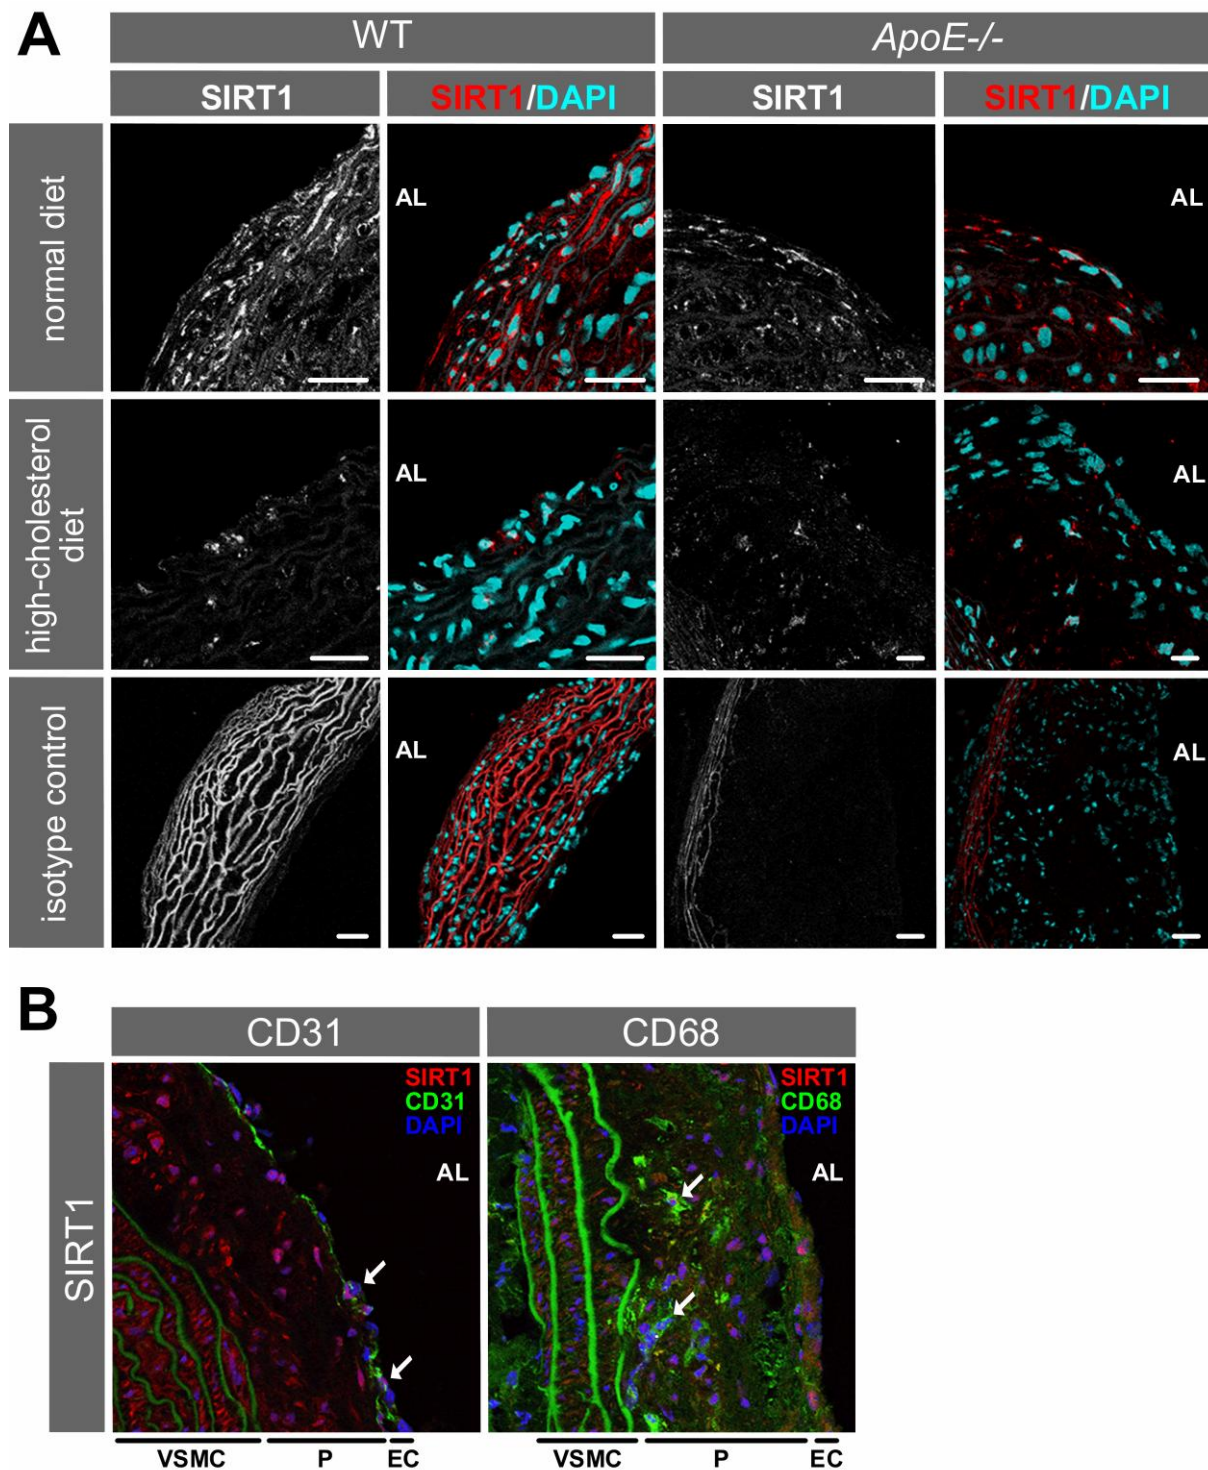

**Supplemental Figure 3.** SIRT1 staining in aortic plaque of wild-type (healthy) and *ApoE*<sup>-/-</sup> (diseased) mice. **(A)** Aortic expression of SIRT1 in wild-type and *ApoE*<sup>-/-</sup> mice fed a normal or high-cholesterol (HC) diet. Large plaques are only observed in *ApoE*<sup>-/-</sup> mice fed a HC diet. Isotype controls were exposed longer and show only unspecific staining of the connective tissue. Bar = 25  $\mu$ m. AL: Arterial lumen. **(B)** SIRT1 colocalizes with endothelial cells (CD31;

arrows), and with macrophages (CD68; arrows) in atherosclerotic plaques. EC: endothelial cell layer; P: Plaque; VSMC: Vascular smooth muscle cells; AL: Arterial lumen.

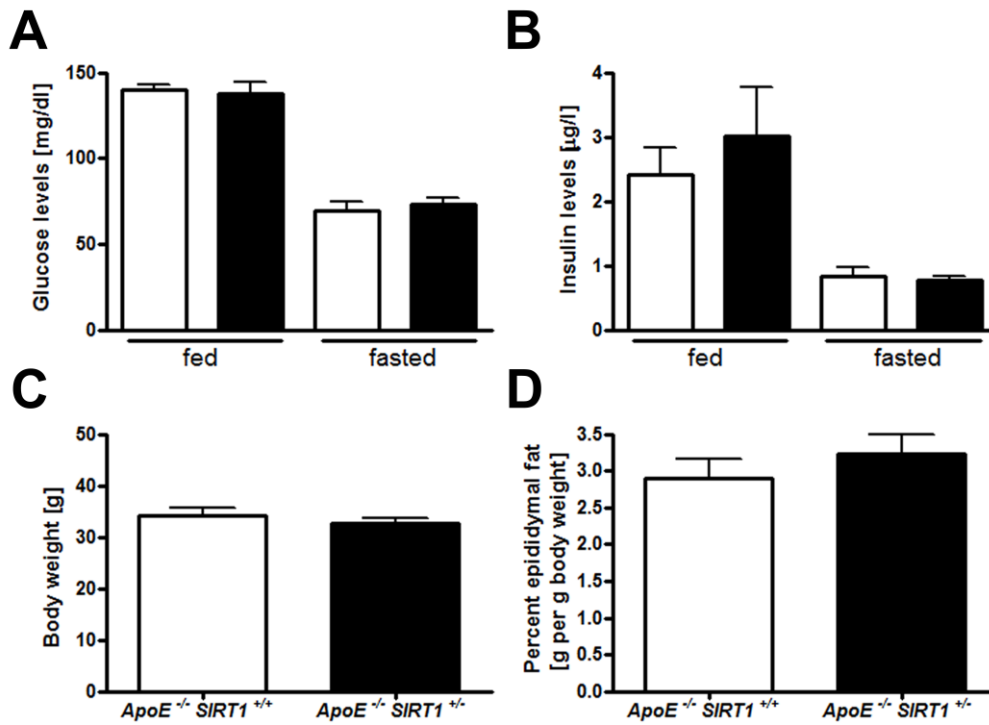

**Supplemental Figure 4.** No difference between *ApoE*<sup>-/-</sup> *SIRT1*<sup>+/+</sup> (white columns) and *ApoE*<sup>-/-</sup> *SIRT1*<sup>+/-</sup> (black columns) mice regarding glucose plasma levels, body weight, and weight of epididymal fat pad. **(A)** Plasma glucose levels in fed and fasted animals. **(B)** Plasma insulin levels in fed and fasted animals. **(C)** Total body weight of mice prior to harvesting. **(D)** Percent epididymal fat, given as the percentage of the epididymal fat per total body weight.  $n \geq 10$  per genotype.

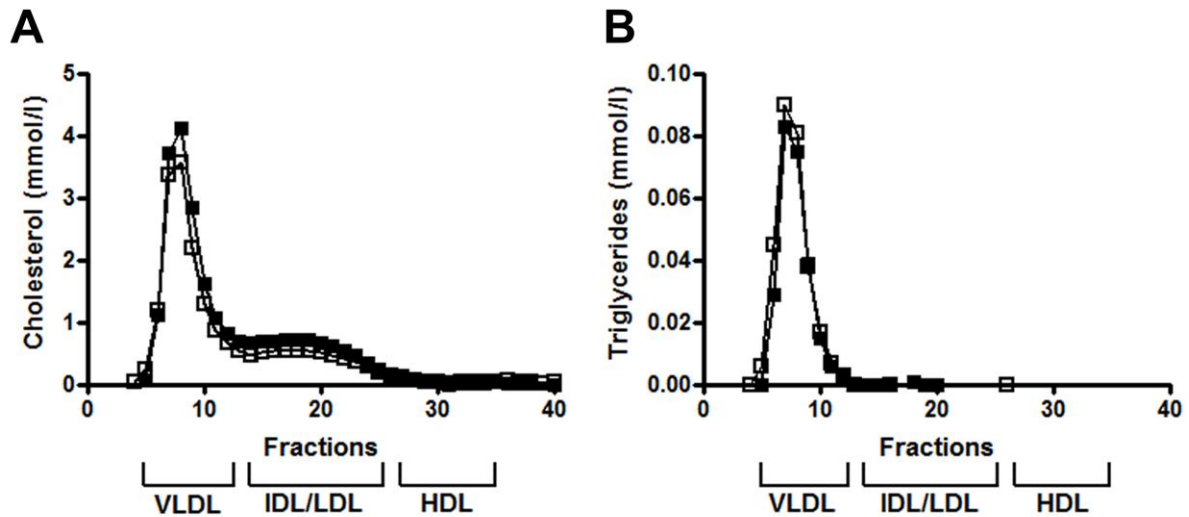

**Supplemental Figure 5.** No alterations of plasma lipid distribution in  $ApoE^{-/-} SIRT1^{+/+}$  &  $ApoE^{-/-} SIRT1^{+/-}$  mice. (A, B) Distribution of cholesterol and triglycerides in the plasma of  $ApoE^{-/-} SIRT1^{+/+}$  mice (■, n = 10 (pooled)) or  $ApoE^{-/-} SIRT1^{+/-}$  mice (□, n = 15 (pooled)). No differences in the distribution of cholesterol or triglycerides are observed between  $ApoE^{-/-} SIRT1^{+/+}$  &  $ApoE^{-/-} SIRT1^{+/-}$  mice. VLDL, very low-density lipoprotein; IDL, intermediate-density lipoprotein; LDL, low-density lipoprotein; HDL, high-density lipoprotein.

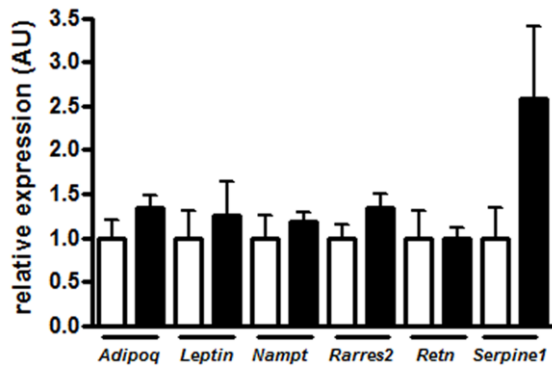

**Supplemental Figure 6.** Epididymal white adipose tissue expression of Adiponectin (Adipoq), Leptin, Visfatin (Nampt), Chemerin (Rarres2), Resistin (Retn) and Plasminogen activator inhibitor 1 (PAI-1 or Serpine1) in ApoE<sup>-/-</sup> SIRT1<sup>+/+</sup> (white columns) and ApoE<sup>-/-</sup> SIRT1<sup>+/-</sup> (black columns) mice. n=6 per genotype.

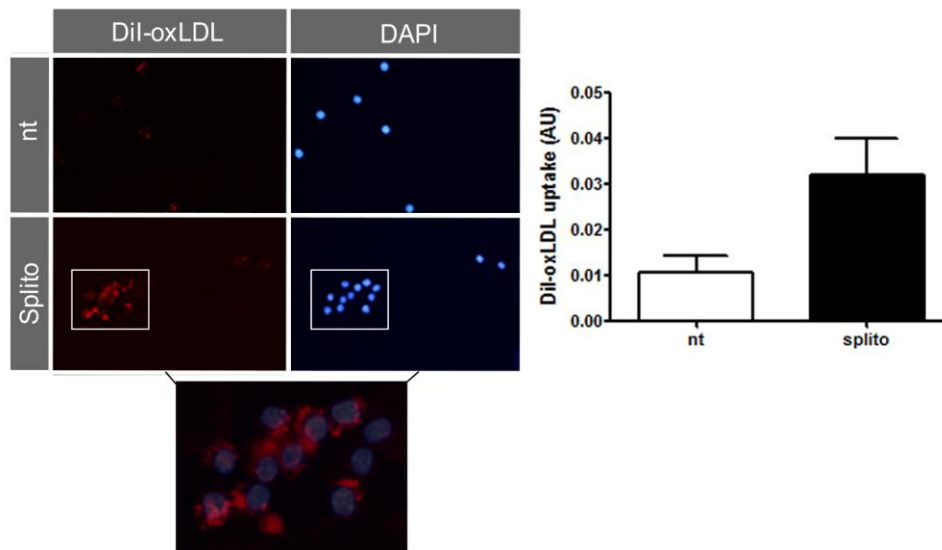

**Supplemental Figure 7.** SIRT1 inhibition with splitomicin (splito) shows a trend towards increased accumulation of oxLDL in RAW 264.7 cells compared to non-treated cells.

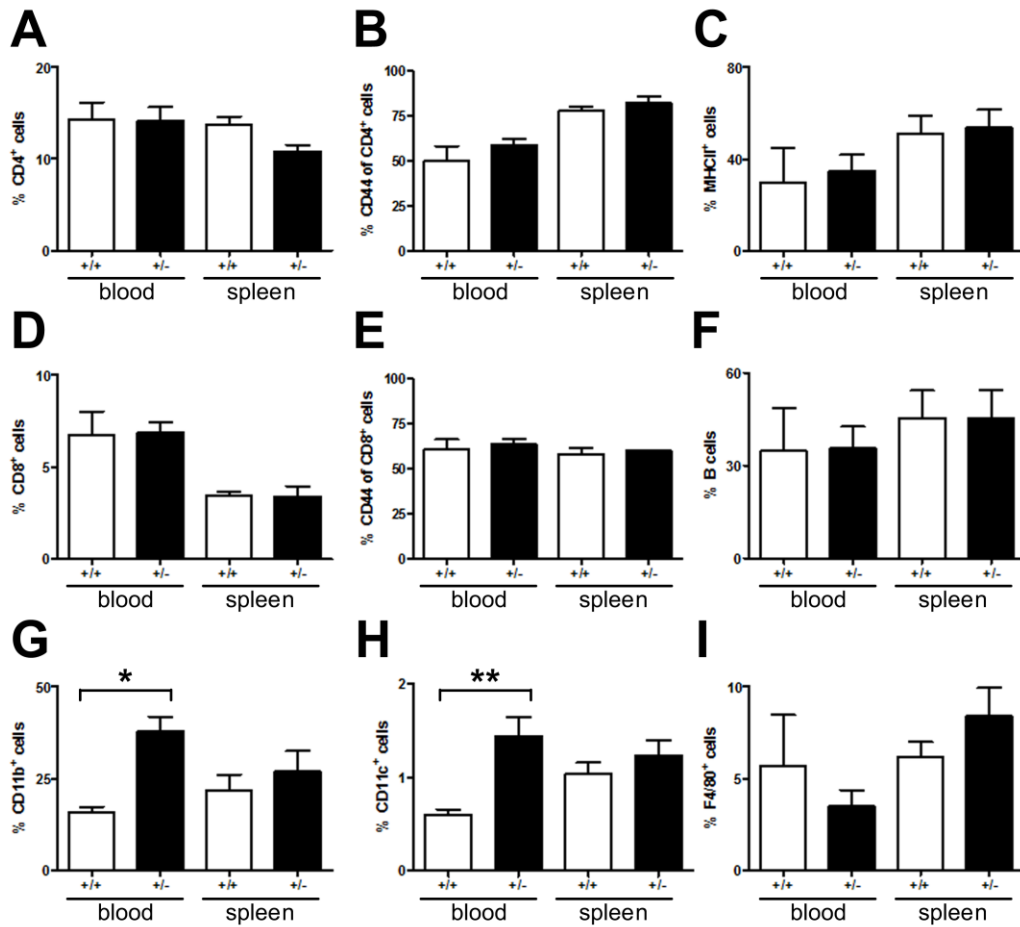

**Supplemental Figure 8.** Blood and spleen analysis of bone-marrow transplanted mice. Percental FACS analyses of (A) CD4<sup>+</sup> cells, (B) CD44<sup>+</sup> population of CD4<sup>+</sup> cells, (C) MHCII<sup>+</sup> cells, (D) CD8<sup>+</sup> cells, (E) CD44<sup>+</sup> population of CD8<sup>+</sup> cells, (F) B cells, (G) CD11b<sup>+</sup> cells, (H) CD11c<sup>+</sup> cells, (I) F4/80<sup>+</sup> cells. n=3/transplanted genotype. \*p<0.05; \*\*p< 0.01.

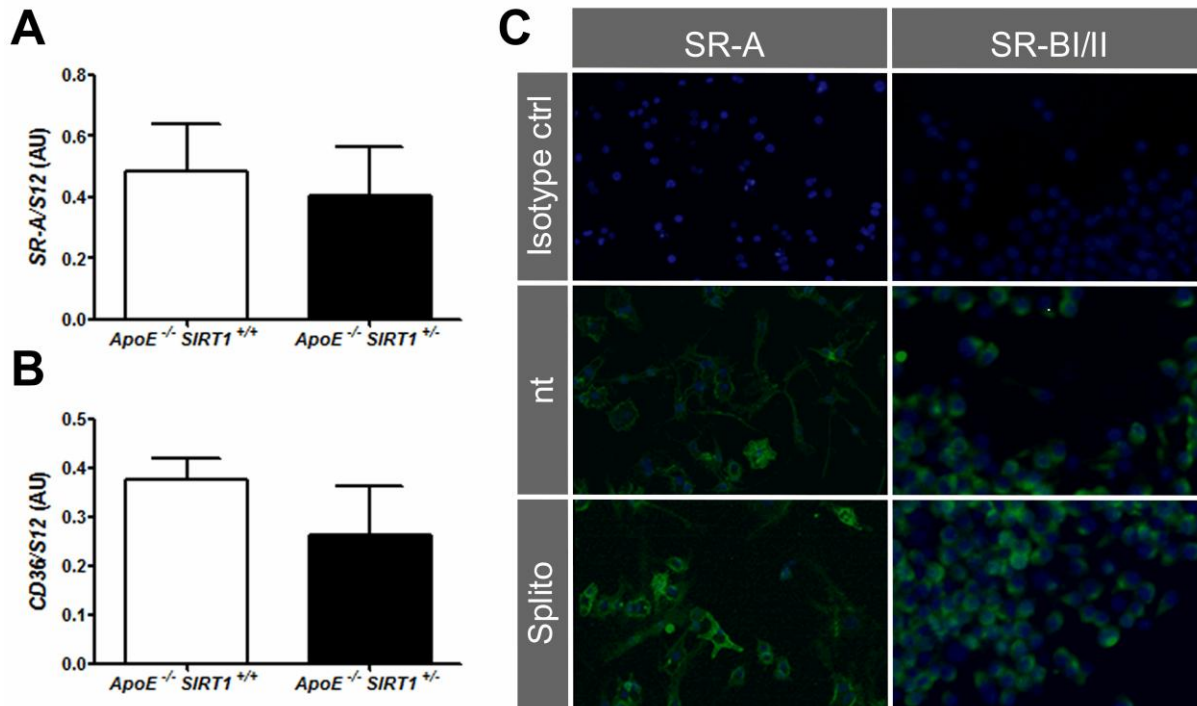

**Supplemental Figure 9.** SIRT1 does not affect the expression of SR-A, CD36, or SR-B. Aortic RNA levels of *SR-A* (**A**) and *CD36* (**B**). (**C**) SR-A and SR-B immunofluorescence in RAW 264.7 macrophages reveals no difference upon splitomicin (Splito) treatment compared with non-treated cells (nt).

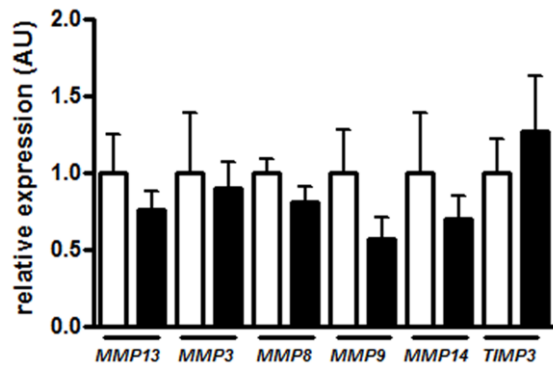

**Supplemental Figure 10.** Aortic expression of *MMP13*, *MMP3*, *MMP8*, *MMP9*, *MMP14*, and *TIMP3* in *ApoE*<sup>-/-</sup> *SIRT1*<sup>+/+</sup> (white columns) and *ApoE*<sup>-/-</sup> *SIRT1*<sup>+/-</sup> (black columns) mice. n=10 per genotype.

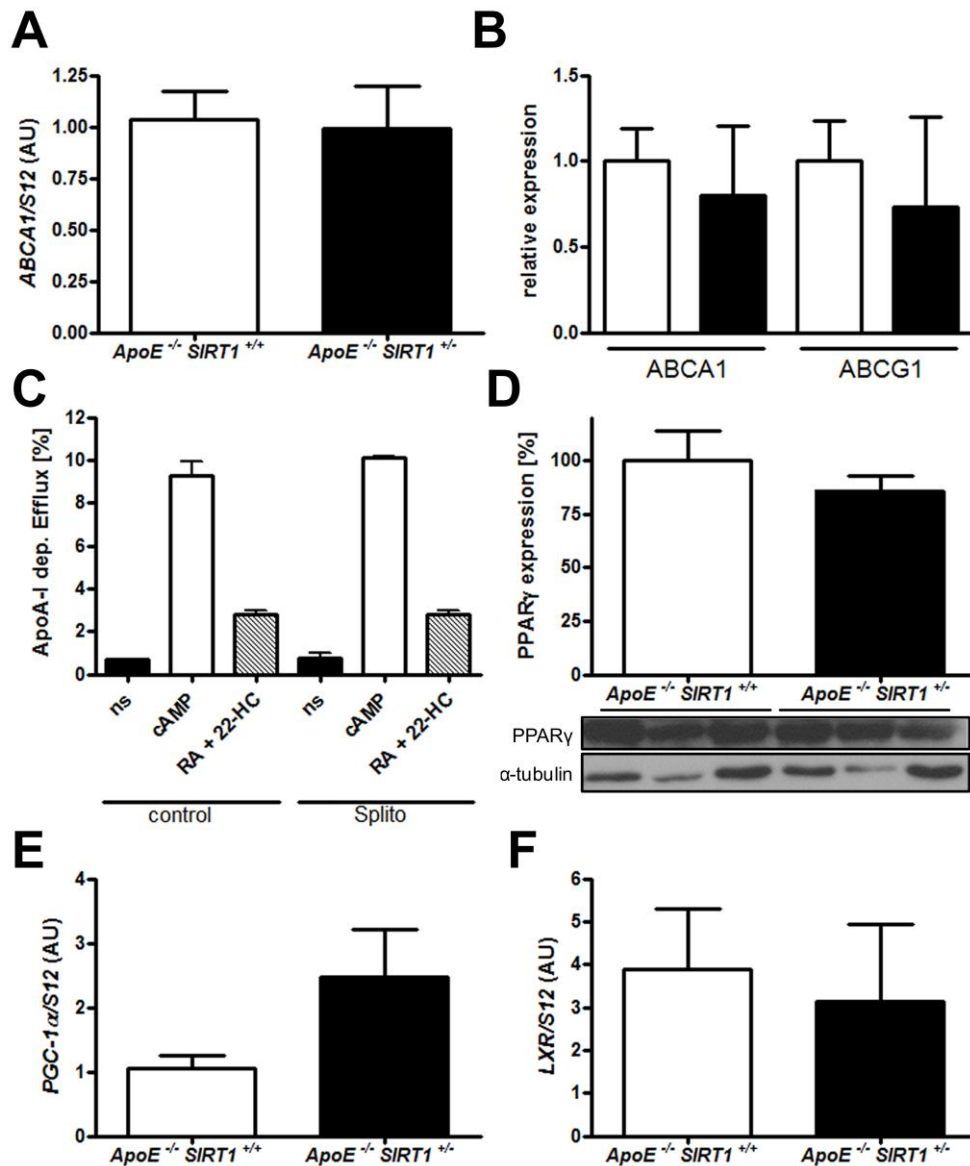

**Supplemental Figure 11.** SIRT1 does not affect cholesterol efflux in macrophages. (A) Aortic RNA levels of *ABCA1*. n=6 per genotype. (B) Expression of *ABCA1* and *ABCG1* in *ApoE*<sup>-/-</sup> *SIRT1*<sup>+/+</sup> (white columns) and *ApoE*<sup>-/-</sup> *SIRT1*<sup>+/-</sup> (black columns) peritoneal macrophages. n=4 per genotype. (C) ApoA-1-dependent cholesterol efflux in RAW 264.7 macrophages is not affected by 100 μM splitomicin (Splito) compared with untreated control groups (nt). 9 *cis*-retinoic acid (RA) + 22-hydroxycholesterol (22-HC)-stimulation is done to analyze LXR/RXR-dependent efflux, cAMP-stimulation to study LXR/RXR-independent efflux. n=3 per treatment group. (D) Aortic expression of PPARγ. n=6 per genotype. (E, F) Aortic RNA levels of PGC-1α (E, n=10 per genotype) and LXRα (F, n=6 per genotype).

## SUPPLEMENTARY TABLES

**Supplemental Table 1:** Plasma lipid profiles of *ApoE*<sup>-/-</sup> *SIRT1*<sup>+/+</sup> and *ApoE*<sup>-/-</sup> *SIRT1*<sup>+/-</sup>.

|                                   | <i>ApoE</i> <sup>-/-</sup> <i>SIRT1</i> <sup>+/+</sup><br>(n=10) | <i>ApoE</i> <sup>-/-</sup> <i>SIRT1</i> <sup>+/-</sup><br>(n=14) |
|-----------------------------------|------------------------------------------------------------------|------------------------------------------------------------------|
| <b>Total cholesterol (mmol/l)</b> | 45.54 ± 6.15                                                     | 39.72 ± 2.56                                                     |
| <b>Triglycerides (mmol/l)</b>     | 2.12 ± 0.24                                                      | 2.03 ± 0.18                                                      |
| <b>Free fatty acids (mmol/l)</b>  | 0.99 ± 0.13                                                      | 0.93 ± 0.09                                                      |

mean ± SEM.

**Supplemental Table 2:** Plasma cytokine values of *ApoE*<sup>-/-</sup> *SIRT1*<sup>+/+</sup> and *ApoE*<sup>-/-</sup> *SIRT1*<sup>+/-</sup>.

|                       | <i>ApoE</i> <sup>-/-</sup> <i>SIRT1</i> <sup>+/+</sup><br>(n=10) | <i>ApoE</i> <sup>-/-</sup> <i>SIRT1</i> <sup>+/-</sup><br>(n=15) |
|-----------------------|------------------------------------------------------------------|------------------------------------------------------------------|
| <b>VCAM-1 (ng/ml)</b> | 1146 ± 59.7                                                      | 1266 ± 62.8                                                      |
| <b>ICAM-1 (ng/ml)</b> | 843 ± 51.4                                                       | 813 ± 31.1                                                       |
| <b>TGF-β</b>          | 6431 ± 644.5                                                     | 6167 ± 332.7                                                     |
| <b>IFN-γ (pg/ml)</b>  | 7.27 ± 3.67                                                      | 16.15 ± 8.26                                                     |
| <b>IL-6 (pg/ml)</b>   | 65.36 ± 21.17                                                    | 127.54 ± 57.67                                                   |
| <b>IL-10 (pg/ml)</b>  | 86.40 ± 40.27                                                    | 189.30 ± 85.90                                                   |
| <b>mKC</b>            | 110.44 ± 22.01                                                   | 138.81 ± 15.64                                                   |

mean ± SEM.
